# Supplementary material for: Revisiting adult neurogenesis and the role of erythropoietin for neuronal and oligodendroglial differentiation in the hippocampus
Source: PubMed Central journal article supplement — Mol Psychiatry. 2016 Jan 26;21(12):1752–67. doi: 10.1038/mp.2015.212 (PMC5193535; doi:10.1038/mp.2015.212), 2016-01-26
Supplement: mp2015212x1.pdf [file mp2015212x1.pdf]

# Revisiting adult neurogenesis and the role of erythropoietin for neuronal and oligodendroglial differentiation in the hippocampus

Imam Hassouna<sup>1\*</sup>, Christoph Ott<sup>1\*</sup>, Liane Dahm<sup>1\*</sup>, Nils Offen<sup>2</sup>, Richard A. Neher<sup>3</sup>, Miso Mitkovski<sup>4</sup>, Daniela Winkler<sup>1</sup>, Swetlana Sperling<sup>1</sup>, Lucia Fries<sup>2</sup>, Sandra Goebbels<sup>5</sup>, Ingrid C. Vreja<sup>6,7</sup>, Nora Hagemeyer<sup>1</sup>, Marcus Dittrich<sup>8</sup>, Maria Florencia Rossetti<sup>1</sup>, Katharina Kröhnert<sup>6</sup>, Kathrin Hannke<sup>1</sup>, Susann Boretius<sup>9</sup>, Andre Zeug<sup>10</sup>, Carmen Höschen<sup>11</sup>, Thomas Dandekar<sup>8</sup>, Ekrem Dere<sup>1</sup>, Erwin Neher<sup>12,13</sup>, Silvio O. Rizzoli<sup>6,13</sup>, Anna-Leena Sirén<sup>2</sup>, Klaus-Armin Nave<sup>5,13§</sup>, and Hannelore Ehrenreich<sup>1,13§</sup>

*\*These authors contributed equally to this work.*

<sup>1</sup>Clinical Neuroscience, Max Planck Institute of Experimental Medicine, Göttingen,

<sup>2</sup>Department of Neurosurgery, University of Würzburg,

<sup>3</sup>Evolutionary Dynamics & Biophysics, Max Planck Institute for Developmental Biology, Tübingen,

<sup>4</sup>Light Microscopy Facility, Max Planck Institute of Experimental Medicine, Göttingen,

<sup>5</sup>Department of Neurogenetics, Max Planck Institute of Experimental Medicine, Göttingen,

<sup>6</sup>Department of Neuro- and Sensory Physiology, University Medical Center Göttingen,

<sup>7</sup>International Max Planck Research School Molecular Biology, Göttingen,

<sup>8</sup>Department of Bioinformatics, Biocenter, University of Würzburg,

<sup>9</sup>Department of Diagnostic Radiology, Christian-Albrechts-Universität, Kiel,

<sup>10</sup>Cellular Neurophysiology, Hannover Medical School, Hannover,

<sup>11</sup>Department of Ecology and Ecosystem Management, Lehrstuhl für Bodenkunde,

Technische Universität München, Freising-Weihenstephan,

<sup>12</sup>Department of Membrane Biophysics, Max Planck Institute for Biophysical Chemistry, Göttingen,

<sup>13</sup>DFG Center for Nanoscale Microscopy and Molecular Physiology of the Brain (CNMPB), Göttingen,  
GERMANY

## Supplementary Information

**Supplementary Figures 1-5, provided as separate files**

**Supplementary Figure Legends 1-5**

**Supplementary Tables 1-5**

**Supplementary Figure 1: Cresyl violet staining of a coronal hippocampus (HC) section.** Shown is a coronal section at approximately bregma  $-1.8$  mm, stained with cresyl violet. Insert in the upper left presents a magnification of the pyramidal layer. Insert in the upper right gives a schematic view of the hippocampus (modified from Franklin and Paxinos, 1997). Corpus callosum (CC), cornu ammonis 1 & 3 (CA1 & CA3), and dentate gyrus (DG) are indicated. The pyramidal layer (Py) within CA1 and CA3 is highlighted in red to show where pyramidal neurons (as well as NeuN+/BrdU+ double-labeled neurons) were counted. CA1, CA3 and DG are framed in yellow to demonstrate where BrdU, TUNEL, Dcx, Pax6, Olig1, PDGFR $\alpha$  and NG2 were stereologically quantified.

**Supplementary Figure 2: EPOR expression in OPC. (A)** EPOR expression in NG2-cells of NG2-Cre-ERT2:R26R-td-tomato-mEGFP mouse brains at postnatal day 31. Lower subpanels show magnification of all channels of the white square area denoted in the overview. **(B)** Western Blot showing specificity of the used EPOR antibody (Ott C, Martens H, Hassouna I, Oliveira B, Erck C, Zafeiriou MP et al. *Widespread expression of erythropoietin receptor in brain and its induction by injury. Mol Med* 2015). **(C)** qPCR analysis of oligodendrocyte lineage genes and EPOR in primary mouse forebrain OPC *in vitro* cultured in serum-free differentiation medium. All qPCR data are normalized to *Hprt* (housekeeper). (n=5 for all genes at 4h and 18h time points and n=4 at 32h, mean $\pm$ SEM, one-way ANOVA); \*\*P<0.01, \*\*\*P<0.001.

**Supplementary Figure 3: EPO effects on neurogenesis in dentate gyrus (DG) and subventricular zone (SVZ).** All data are based on bilateral counting. **(A-F)** Proliferation (BrdU+ cells, placebo n=9 and EPO n=10 for DG; placebo n=8 and EPO n=9 for SVZ), apoptosis (Tunel+ cells, placebo n=9 and EPO n=10 for DG; placebo and EPO n=10 for SVZ) and differentiation (Dcx+ cells) at 1 week (w1, placebo n=10 and EPO n=9 for both DG and SVZ) and 4 weeks (w4, placebo n=5 and EPO n=6 for BrdU+ cells; placebo n=7 and EPO n=9 in DG, placebo n=9 and EPO n=10 in SVZ for tunel+ cells; placebo n=8 and EPO n=10 for Dcx+ cells for both DG and SVZ) after start of EPO/placebo treatment. **(G-I)** Confocal analysis of BrdU and NeuN double-positive cells (n=4 for both groups; BrdU+, red; NeuN+, green) and presentation of a sample picture in 2 magnifications. All bar graphs are shown as mean $\pm$ SEM; all analyses unpaired, two-tailed *t*-tests; \*P<0.05, \*\*P<0.01.

**Supplementary Figure 4: EPO effects on quaternary E14 forebrain neurospheres cultured under proliferating and differentiating conditions: (A,B)** Quaternary E14 forebrain neurospheres cultured under proliferating conditions: **(A)** Experimental design. **(B)** qPCR analysis of EPOR expression (n=3) and EPOR functionality testing by Western blot analysis of pMAPK/MAPK (n=6 per group, paired two-tailed *t*-test) 10min after EPO/placebo at 24h in culture. **(C-H)** Quaternary E14 forebrain neurospheres cultured under differentiating conditions: **(C)** Experimental design. **(D)** qPCR analysis of EPOR expression (n=3) and EPOR functionality testing by Western blot analysis of pMAPK/MAPK (n=7 per group, paired one-tailed *t*-test) 10min after EPO/placebo after 24h in culture, respectively. **(E)** qPCR results showing relative mRNA expression under placebo conditions of the differentiation markers Sox9, ND1, Dcx, MAP2, GFAP and S100B at 24h, 96h and 168h expressed as percent of the respective 0.3h values (Sox9: 0.3h n=6, 24h n=10, 96h n=9, 168h n=9; ND1: 0.3h n=6, 24h n=10, 96h n=10, 168h n=9; Dcx: 0.3h n=6, 24h n=10, 96h n=10, 168h n=9; MAP2: 0.3h n=6, 24h n=10, 96h n=10, 168h n=9; GFAP: 0.3h n=6, 24h n=10, 96h n=10, 168h n=9; S100B 0.3h n=6, 24h n=6, 96h n=6, 168h n=6). **(F)** Culture composition showing Tuj1+ and GFAP+ cells in percent of total cell number (DAPI) (n=4 per group). **(G)** Cell death analyzed with Trypan blue (n=4 per group, paired two-tailed *t*-test). **(H)** Cell number (DAPI counts) (n=4 per group, paired two-tailed *t*-test). All bar graphs are shown as mean±SEM; \*P<0.05.

**Supplementary Figure 5: EPO effects on differentiation of E17 hippocampal cultures (E17 HCC).** **(A)** Experimental design. **(B)** qPCR analysis of EPOR expression (n=4 per group) and EPOR functionality testing by Western blot analysis of pMAPK/MAPK (n=4 per group, paired two-tailed *t*-test) 10min after EPO/placebo at the seeding time point and at 24h in culture, respectively. **(C)** qPCR results showing relative mRNA expression under placebo conditions of the differentiation markers Sox9, ND1, Dcx, MAP2, GFAP and S100B at 0.5, 1, 3, 6, 12 and 24h expressed as percent of the respective 0.25h values (Sox9: 0.25h n=10, 0.5h n=7, 1h n=8, 3h n=8, 6h n=8, 12h n=4, 24h n=6; ND1: 0.25h n=9, 0.5h n=5, 1h n=7, 3h n=7, 6h n=7, 12h n=4, 24h n=6; Dcx: 0.25h n=9, 0.5h n=8, 1h n=6, 3h n=6, 6h n=7, 12h n=6, 24h n=9; MAP2: 0.25h n=14, 0.5h n=9, 1h n=10, 3h n=8, 6h n=8, 12h n=8, 24h n=12; GFAP: 0.25h n=7, 0.5h n=7, 1h n=6, 3h n=7, 6h n=7, 12h n=8, 24h n=8; S100B: 0.25h n=8, 0.5h n=8, 1h n=5, 3h n=7, 6h n=7, 12h n=7, 24h n=6). **(D,E)** qPCR results of the early neural markers Sox9 (0.25h n=10, 0.5h n=7, 1h n=8, 3h n=8, 6h n=8, 12h n=4, 24h n=6; paired two-tailed *t*-test per time point) and ND1 (0.25h n=9, 0.5h n=5, 1h n=7, 3h n=7, 6h n=7, 12h n=4, 24h n=9; paired two-tailed *t*-test per time point) after

EPO, expressed in % placebo **(F)** Dcx/MAP2 ratio after EPO, expressed in % placebo (0.25h n=7, 0.5h n=7, 1h n=4, 3h n=6, 6h n=5, 12h n=4, 24h n=4; paired two-tailed *t*-test per time point). **(G)** Dcx/MAP2 ratio based on immunocytochemical analysis of integrated density (n=5 per group, paired two-tailed *t*-test per time point). **(H)** Confocal picture illustrating the distribution of Dcx and MAP2 staining. **(I,J)** qPCR results of GFAP (0.25h n=7, 0.5h n=7, 1h n=6, 3h n=6, 6h n=7, 12h n=7, 24h n=7; paired two-tailed *t*-test per time point) and S100B (0.25h n=8, 0.5h n=8, 1h n=5, 3h n=7, 6h n=7, 12h n=7, 24h n=5; paired two-tailed *t*-test per time point) after EPO, expressed in % placebo. **(K)** Culture composition showing Dcx+ and GFAP+ cells in percent of total cell number (DAPI) (n=9 per group), P=Placebo, E=EPO. **(L,M)** Cell death and cell number (n=5 for both groups and readouts, paired two-tailed *t*-test per time point) analyzed with DAPI. All bar graphs are shown as mean±SEM; \*P<0.05, \*\*P<0.01, \*\*\*P<0.001 (paired *t*-test). Compare Supplementary Tables 4 and 5.

### Supplementary Table 1

**Number of pyramidal neurons in the hippocampus 4 weeks after start of EPO or placebo treatment:** Given are numbers obtained upon direct counting ( $\Sigma Q^-$ ; raw data) and the final numbers according to the stereological calculation (N).

| Treatment            | Mouse ID<br>(internal) | Pyramidal neurons (#)  |                                  |                         |                                  |
|----------------------|------------------------|------------------------|----------------------------------|-------------------------|----------------------------------|
|                      |                        | $\Sigma Q^-$           | CA1<br>N                         | $\Sigma Q^-$            | CA3<br>N                         |
| PL (1)               | CM-2                   | 966                    | 115920                           | 871                     | 104520                           |
|                      | CM-3                   | 947                    | 113640                           | 921                     | 110520                           |
|                      | CN-1                   | 956                    | 114720                           | 926                     | 111120                           |
|                      | CN-4                   | 956                    | 114720                           | -                       | -                                |
|                      | CO-1                   | 778                    | 93360                            | 778                     | 93360                            |
|                      | CO-2                   | 834                    | 100080                           | 908                     | 108960                           |
|                      | CO-4                   | 860                    | 103200                           | 874                     | 104880                           |
|                      | CP-1                   | 943                    | 113160                           | 802                     | 96240                            |
|                      | CP-2                   | 977                    | 117240                           | 698                     | 83760                            |
|                      | PL (2)                 | B1*                    | 839                              | 100680                  | 607                              |
| B3*                  |                        | 806                    | 96720                            | 754                     | 90480                            |
| B4*                  |                        | 833                    | 99960                            | 682                     | 81840                            |
| D1*                  |                        | 948                    | 113760                           | 824                     | 98880                            |
| D2*                  |                        | 874                    | 104880                           | 721                     | 86520                            |
| D4*                  |                        | 876                    | 105120                           | 759                     | 91080                            |
| E3*                  |                        | 809                    | 97080                            | 774                     | 92880                            |
| E4*                  |                        | 1003                   | 120360                           | 673                     | 80760                            |
| <b>Mean<br/>±SEM</b> |                        | <b>894.4</b><br>±17.19 | <b><u>107329.41</u></b><br>±2063 | <b>785.8</b><br>±24.06  | <b><u>94290</u></b><br>±2887     |
| EPO (1)              | CM-1                   | 1122                   | 134640                           | 1118                    | 134160                           |
|                      | CM-4                   | 1041                   | 124920                           | 847                     | 101640                           |
|                      | CM-5                   | 1117                   | 134040                           | 952                     | 114240                           |
|                      | CN-3                   | 1076                   | 129120                           | 936                     | 112320                           |
|                      | CN-5                   | 1026                   | 123120                           | 1009                    | 121080                           |
|                      | CO-3                   | 1157                   | 138840                           | 1219                    | 146280                           |
|                      | CO-5                   | 959                    | 115080                           | 844                     | 101280                           |
|                      | CP-3                   | 1012                   | 121440                           | 1114                    | 133680                           |
|                      | CP-4                   | 934                    | 112080                           | 796                     | 95520                            |
|                      | CP-5                   | 1126                   | 135120                           | 981                     | 117720                           |
| EPO (2)              | A5*                    | 872                    | 104640                           | 752                     | 90240                            |
|                      | B2*                    | 880                    | 105600                           | 792                     | 95040                            |
|                      | B5*                    | 958                    | 114960                           | 1093                    | 131160                           |
|                      | C1*                    | 1064                   | 127680                           | 876                     | 105120                           |
|                      | D3*                    | 915                    | 109800                           | 864                     | 103680                           |
|                      | D5*                    | 889                    | 106680                           | 676                     | 81120                            |
|                      | E1*                    | 1192                   | 143040                           | 1002                    | 120240                           |
|                      | E2*                    | -                      | -                                | 667                     | 80040                            |
| <b>Mean<br/>±SEM</b> |                        | <b>1020</b><br>± 24.98 | <b><u>122400</u></b><br>± 2997   | <b>918.8</b><br>± 36.85 | <b><u>110253.33</u></b><br>±4422 |

\*mice injected with BrdU (cohort2)

The data are calculated with the stereological formula: 
$$N = \Sigma Q^- \cdot \frac{1}{ssf} \cdot \frac{1}{asf} \cdot \frac{1}{tsf}$$

The total number of pyramidal neurons (N) is calculated by the count of pyramidal neurons ( $\Sigma Q^-$ ), multiplied with the section sampling fraction (ssf), the area sampling fraction (asf) and the thickness sampling fraction (tsf). Counting was performed by an investigator unaware of group assignment of the mice ('blinded'). Two independent cohorts of mice were examined, with only the second cohort receiving BrdU injections. Cohort 1: Placebo group 1 (PL (1)) and EPO group 1 (EPO (1)). Cohort 2: Placebo group 2 (PL (2)) and EPO group 2 (EPO (2)). Underlined are the mean values presented in Figure 1B.

## Supplementary Table 2

### qPCR results (mean±SEM) of mRNA expression in differentiating neurospheres

(Mean values are presented in Supplementary Figure 4E)

|       | 24h          | 96h          | 168h         |
|-------|--------------|--------------|--------------|
| Sox9  | -45.68±10.72 | -49.78±5.21  | -48.66±4.19  |
| ND1   | 17.66±28.94  | 274.00±96.06 | 99.77±24.44  |
| Dcx   | 28.21±24.87  | 251.10±45.40 | 71.24±9.71   |
| MAP2  | 83.78±10.40  | 86.17±15.71  | 69.86±12.51  |
| GFAP  | 5.17±16.93   | 57.61±40.92  | 69.51±47.17  |
| S100B | 169.30±38.93 | 319.20±56.94 | 223.30±37.15 |

Data calculated according to the formula:  $100 \times (\text{placebo}(t) - \text{mean placebo}(t=0.3)) / \text{mean placebo}(t=0.3)$

## Supplementary Table 3

### qPCR results (mean±SEM) of mRNA expression in differentiating neurospheres after EPO, expressed as % placebo

(Data are presented in Figure 5D,E,F,G,H)

|          | 0.3h        | 24h           | 96h           | 168h           |
|----------|-------------|---------------|---------------|----------------|
| Sox9     | 23.63*±7.34 | -23.26**±3.74 | -31.90±12.59  | -15.77***±2.08 |
| ND1      | 5.96±9.70   | -17.83**±3.00 | -42.67*±10.83 | -27.21*±10.18  |
| Dcx/MAP2 | 4.41±7.26   | 12.59±7.01    | -27.02*±11.67 | -19.97±8.21    |
| GFAP     | -2.97±3.44  | 25.33**±4.89  | 42.71**±4.63  | 16.02±39.77    |
| S100B    | 2.82±5.60   | -7.49±3.51    | 17.03±8.24    | 11.58±6.07     |

\*P≤0.05, \*\*P≤0.01, \*\*\*P≤0.001 (paired t-test)

Data calculated according to the formula:  $100 \times (\text{EPO}(t) - \text{placebo}(t)) / \text{placebo}(t)$

### Supplementary Table 4

#### qPCR results (mean±SEM) of mRNA expression in E17 HCC

(Mean values are presented in Supplementary Figure 5C)

|       | 0.5h         | 1h           | 3h           | 6h           | 12h          | 24h          |
|-------|--------------|--------------|--------------|--------------|--------------|--------------|
| Sox9  | -13.91±30.32 | 92.21±38.56  | 46.18±32.76  | -36.27±8.25  | -54.63±5.87  | -64.10±6.55  |
| ND1   | -12.74±17.11 | -32.58±8.43  | -4.71±7.55   | -11.95±9.91  | 11.16±18.59  | 25.63±13.35  |
| Dcx   | -31.42±30.14 | -19.69±39.20 | -25.57±21.93 | -23.15±16.01 | -26.01±24.53 | -18.14±10.67 |
| MAP2  | -0.32±11.81  | 3.20±10.05   | -17.07±7.73  | -34.21±6.19  | -12.89±7.05  | -28.10±14.34 |
| GFAP  | 21.04±12.76  | 68.95±19.64  | 129.80±74.05 | 105.70±21.57 | 236.90±30.23 | 240.90±65.48 |
| S100B | -13.90±22.52 | -27.33±14.51 | -39.79±10.02 | -40.14±10.82 | 17.74±10.35  | 247.90±51.03 |

Data calculated according to the formula:  $100 * (\text{placebo}(t) - \text{mean placebo}(t=0.3)) / \text{mean placebo}(t=0.3)$

### Supplementary Table 5

#### qPCR results (mean±SEM) of mRNA expression in E17 HCC after EPO, expressed as % placebo

(Data are presented in Supplementary Figure 5D,E,F,I,J)

|          | 0.25h        | 0.5h         | 1h            | 3h          | 6h           | 12h          | 24h         |
|----------|--------------|--------------|---------------|-------------|--------------|--------------|-------------|
| Sox9     | 37.69*±12.39 | 31.71±19.25  | 41.02±23.27   | -1.80±8.04  | 8.91±17.08   | 7.10±9.59    | 5.20±9.42   |
| ND1      | 1.02±9.38    | -13.44±4.88  | -13.77*±4.86  | -9.79±6.63  | -6.76±7.10   | -14.55±12.95 | -3.73±11.69 |
| Dcx/MAP2 | 21.90±16.21  | 6.20±9.46    | 30.62±10.67   | -0.92±8.43  | -15.13*±4.98 | 0.26±11.45   | 0.51±6.42   |
| GFAP     | 10.90±11.77  | -3.51±4.97   | -20.42*±7.01  | -8.69±8.66  | 0.76±13.60   | -8.59±9.46   | -2.34±5.97  |
| S100B    | -24.19±11.37 | -24.81*±8.93 | -30.59**±4.98 | -4.04±15.22 | 3.53±9.44    | -0.70±7.35   | -10.07±6.11 |

\*P≤0.05, \*\*P≤0.01, \*\*\*P≤0.001 (paired t-test)

Data calculated according to the formula:  $100 * (\text{EPO}(t) - \text{placebo}(t)) / \text{placebo}(t)$
